# Supplementary material
Source: PubMed Central journal article supplement (PMC5658140)
Supplement: NIHMS912020-supplement-1.pdf [file NIHMS912020-supplement-1.pdf]

# ADVANCED FUNCTIONAL MATERIALS

## Supporting Information

for *Adv. Funct. Mater.*, DOI: 10.1002/adfm.201602808

Multifunctional Photonics Nanoparticles for Crossing the  
Blood–Brain Barrier and Effecting Optically Trackable Brain  
Theranostics

*Ajay Singh, Woong Kim, Youngsun Kim, Keunsoo Jeong,  
Chi Soo Kang, YoungSoo Kim, Joonseok Koh, Supriya D.  
Mahajan, Paras N. Prasad,\* and Sehoon Kim\**

Copyright WILEY-VCH Verlag GmbH & Co. KGaA, 69469 Weinheim, Germany, 2013.

## Supporting Information

### **Multifunctional Photonics Nanoparticles for Crossing the Blood-Brain Barrier and Effecting Optically Trackable Brain Theranostics**

*Ajay Singh, Woong Kim, Youngsun Kim, Keunsoo Jeong, Chi Soo Kang, YoungSoo Kim, Joonseok Koh, Supriya D. Mahajan, Paras N. Prasad,\* and Sehoon Kim\**

Dr. A. Singh, Dr. W. Kim, Y. Kim, Dr. K. Jeong, Dr. C. S. Kang, Dr. Y. Kim, Dr. S. Kim  
Center for Theragnosis and Center for Neuro-Medicine, Korea Institute of Science and  
Technology (KIST), Seoul 136-791, Korea  
E-mail: sehoonkim@kist.re.kr

Dr. A. Singh, Prof. P. N. Prasad  
Institute for Lasers, Photonics and Biophotonics, Department of Chemistry, State University  
of New York, Buffalo, NY 14260, USA  
E-mail: pnprasad@buffalo.edu

Prof. J. Koh  
Department of Organic and Nano System Engineering, Konkuk University, Seoul 143-701,  
Korea

Prof. S. D. Mahajan  
Department of Medicine, Division of Allergy, Immunology, and Rheumatology, State  
University of New York, Clinical Translational Research Center, Buffalo, NY 14203, USA

## Supplementary Schemes and Figures

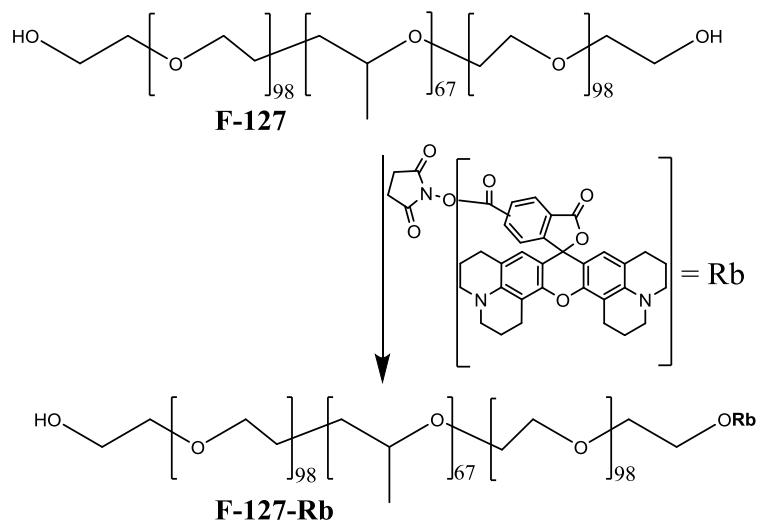**Scheme S1.** Chemical structure and synthetic route of F-127-Rh.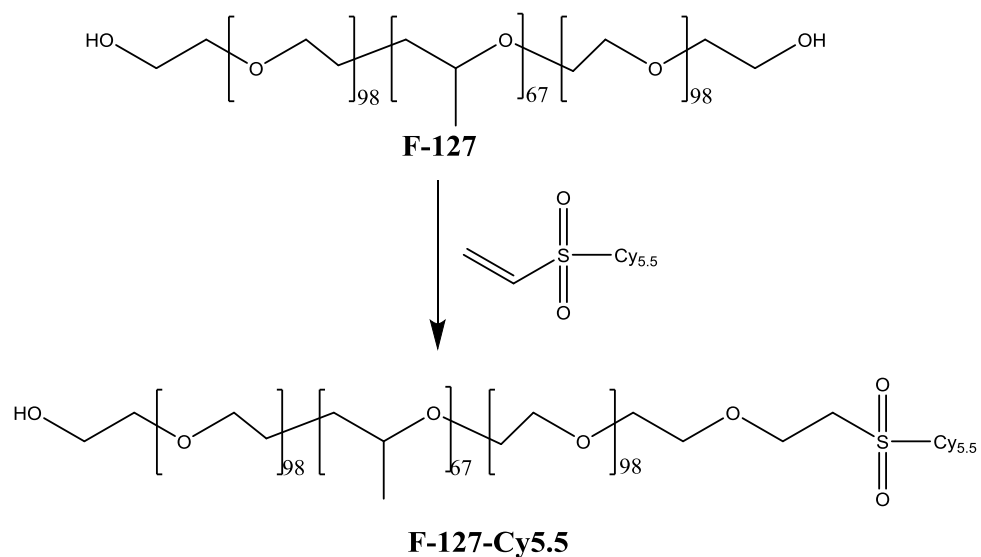**Scheme S2.** Chemical structure and synthetic route of F-127-Cy5.5.

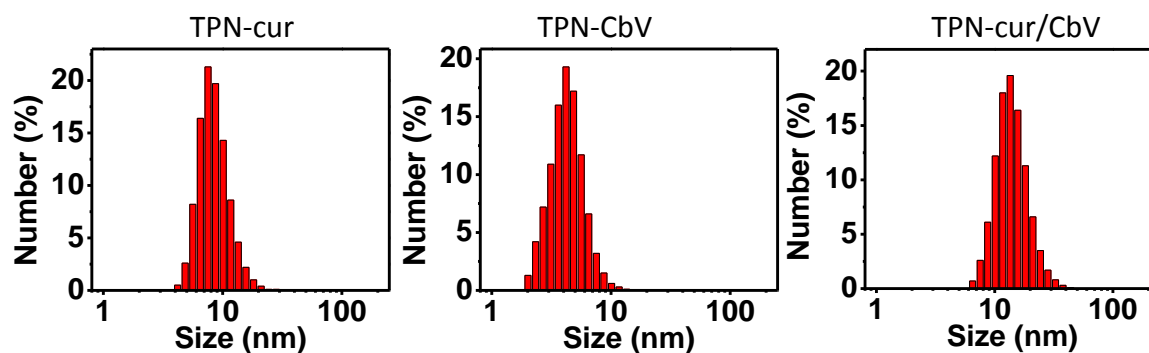

**Figure S1.** Number-averaged hydrodynamic size distributions of TPNs.

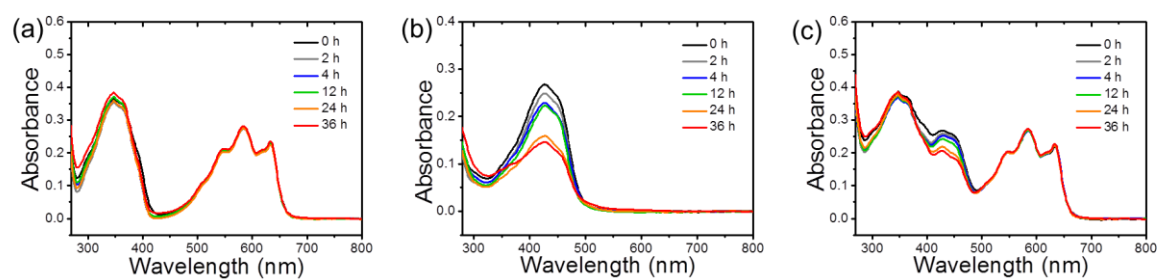

**Figure S2.** Temporal evolution of absorption spectra: (a) TPN-CbV, (b) TPN-cur, and (c) TPN-CbV/cur. Each TPN was diluted with buffer (PBS, pH 7.4) by ten times and incubated at 37 °C.

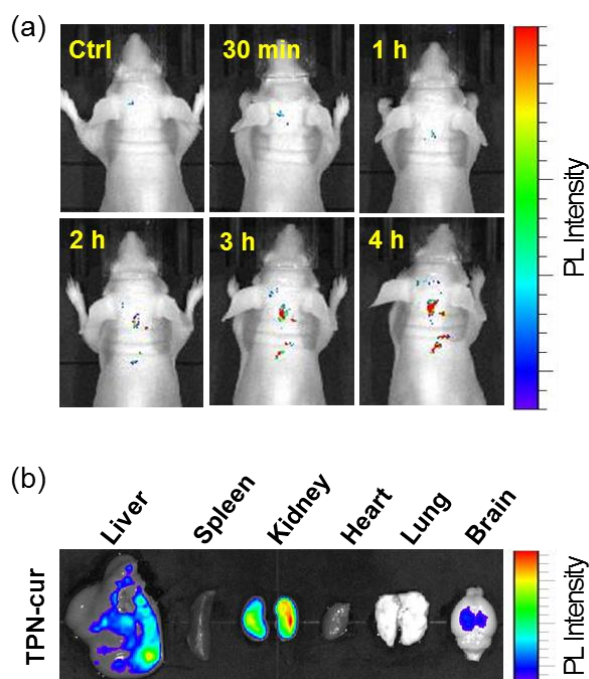

**Figure S3.** (a) *In vivo* fluorescence imaging of temporal signals from free curcumin (10  $\mu\text{g}$  of curcumin in 20  $\mu\text{L}$  of DMSO) intraperitoneally injected to a normal mouse. (b) *Ex vivo* fluorescence image of major organs resected at 4 h post-injection of free curcumin. A filter set (Excitation: 500 nm, Emission: 570 nm) was used for the fluorescence images.

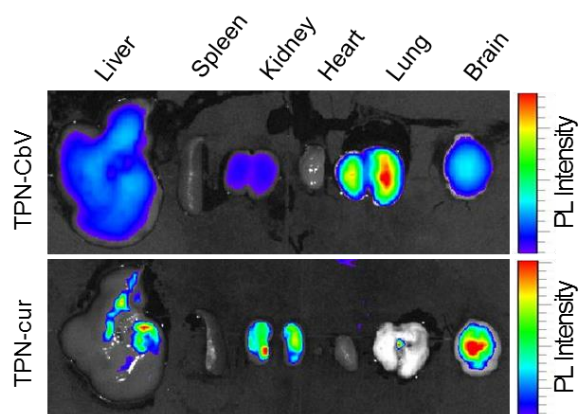

**Figure S4.** *Ex vivo* fluorescence images of major organs resected at 4 h post-injection of TPN-cur and TPN-CbV ( $n = 3$ ). Filter sets: TPN-cur ( $\lambda_{\text{ex}} = 500 \text{ nm}$ ,  $\lambda_{\text{em}} = 570 \text{ nm}$ ), TPN-CbV ( $\lambda_{\text{ex}} = 640 \text{ nm}$ ,  $\lambda_{\text{em}} = 710 \text{ nm}$ ). In case of TPN-CbV, the most intense signal was found at lung, indicating the lung-favorable accumulation of TPN-CbV.

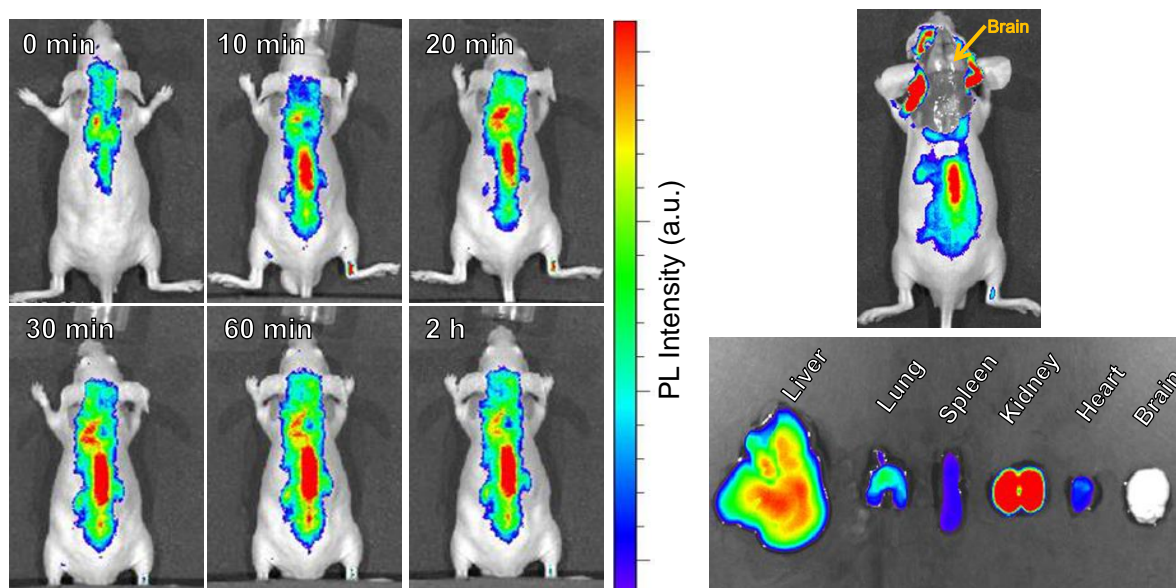

**Figure S5.** (left) *In vivo* imaging of temporal signals from F-127-Cy5.5 intravenously injected to normal mice, and (right) *ex vivo* images of the sacrificed body and major organs resected at 4 h post-injection. Imaging time points are indicated in the *in vivo* images.

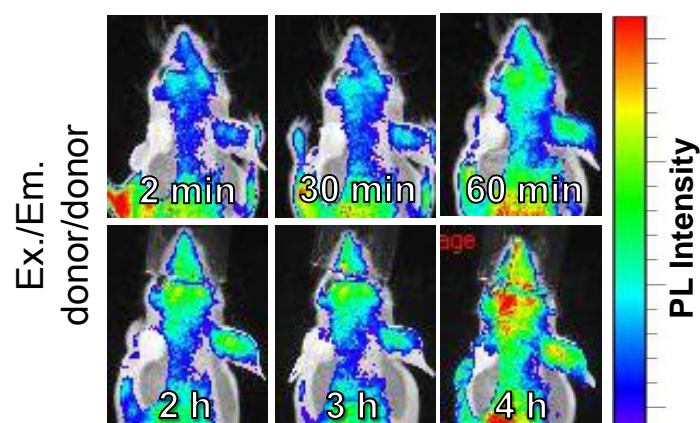

**Figure S6.** *In vivo* imaging of temporal signals from TPN-cur/CbV intravenously injected to normal mice. Excitation/emission wavelengths are (a) 500 nm/540 nm (directly excited curcumin emission).

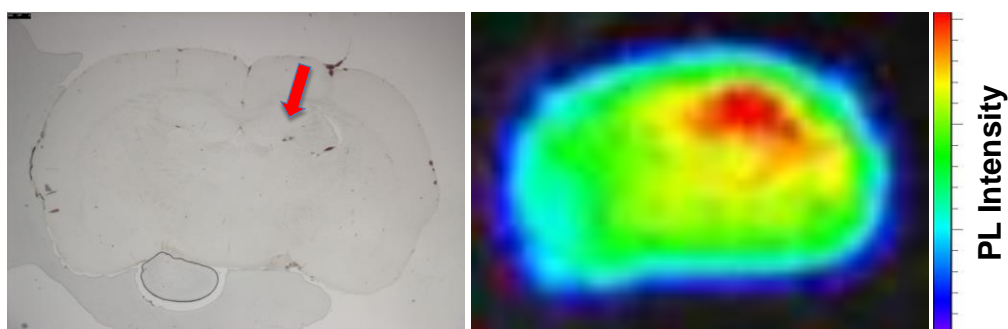

**Figure S7.** Optical (left) and fluorescence (right) images of brain section. The red arrow indicates the GBM xenograft in the brain. In the right image, the fluorescence signal of TPN-CbV at 700 nm was taken under excitation at 640 nm.

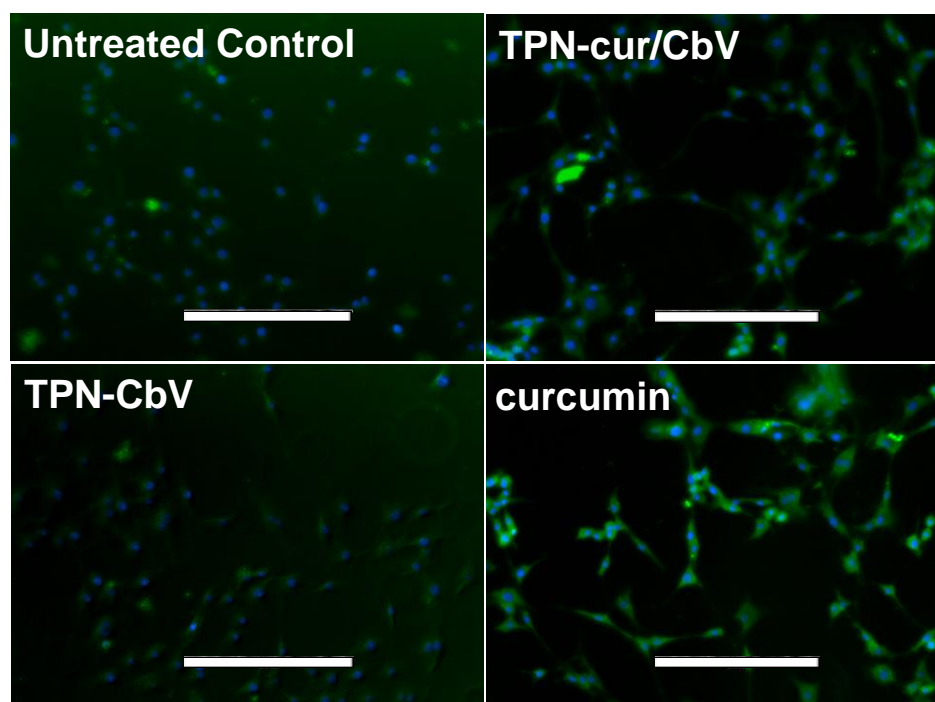

**Figure S8.** Immunostaining of pro-apoptotic BCL-xS expressed in rat C6 malignant glioma cells treated with TPN-CbV, curcumin, and TPN-cur/CbV. Scale bars: 200  $\mu\text{m}$ .

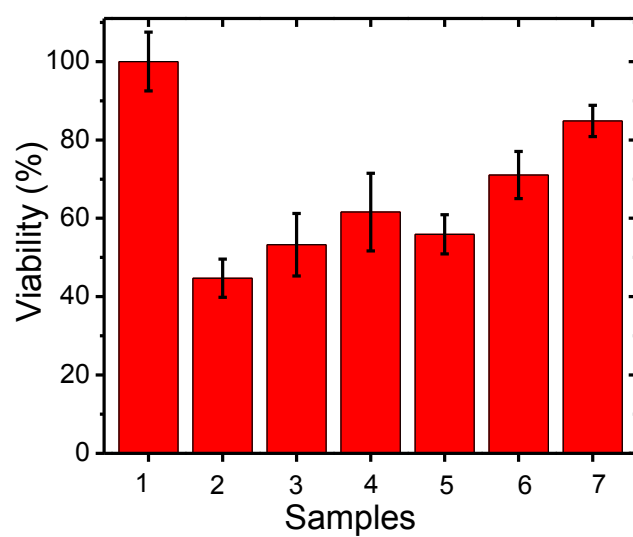

**Figure S9.** *In vitro* MTT assay showing cytotoxicity of TPN-cur and TPN-cur/CbV at concentrations of 20 mg/mL with varying volumes: (1) control (F-127), (2) TPN-cur (100  $\mu$ L), (3) TPN-cur (50  $\mu$ L), (4) TPN-cur (10  $\mu$ L), (5) TPN-cur/CbV (100  $\mu$ L), (6) TPN-cur/CbV (50  $\mu$ L), (7) TPN-cur/CbV (10  $\mu$ L).
